# Supplementary material
Source: MDPI journal article supplement (https://www.mdpi.com/2071-1050/10/5/1447)
Supplement: s1 [file s1]

**Table A1.** Summary of the key outcomes of Phase 1–3.

|                                     | Phase I                | Phase II                  |                             | Phase III                         |                                        |
|-------------------------------------|------------------------|---------------------------|-----------------------------|-----------------------------------|----------------------------------------|
| <b>Mountain<br/>Railways [N=23]</b> | <b>main<br/>motive</b> | <b>visitor<br/>effect</b> | <b>marketing<br/>effect</b> | <b>distribution<br/>of income</b> | <b>fulfillment of<br/>expectations</b> |
| MR1                                 | economic               | positive                  | positive                    | alright                           | yes                                    |
| MR2                                 | other                  | positive                  | positive                    | undefined                         | yes                                    |
| MR3                                 | economic               | neutral                   | positive                    | alright                           | yes                                    |
| MR4                                 | other                  | positive                  | positive                    | alright                           | yes                                    |
| MR5                                 | economic               | positive                  | neutral                     | alright                           | yes                                    |
| MR6                                 | economic               | undefined                 | positive                    | alright                           | yes                                    |
| MR7                                 | economic               | neutral                   | positive                    | alright                           | yes                                    |
| MR8                                 | economic               | positive                  | neutral                     | alright                           | yes                                    |
| MR8                                 | other                  | positive                  | positive                    | alright                           | yes                                    |
| MR9                                 | economic               | positive                  | positive                    | alright                           | yes                                    |
| MR10                                | economic               | undefined                 | undefined                   | alright                           | yes                                    |
| MR11                                | other                  | positive                  | positive                    | alright                           | yes                                    |
| MR12                                | economic               | neutral                   | positive                    | unfair                            | yes                                    |
| MR13                                | undefined              | positive                  | positive                    | alright                           | undefined                              |
| MR14                                | non-economic           | neutral                   | neutral                     | undefined                         | undefined                              |
| MR15                                | other                  | positive                  | undefined                   | alright                           | yes                                    |
| MR16                                | economic               | neutral                   | neutral                     | alright                           | undefined                              |
| MR17                                | economic               | positive                  | undefined                   | alright                           | undefined                              |
| MR18                                | economic               | positive                  | positive                    | alright                           | yes                                    |
| MR19                                | other                  | positive                  | positive                    | undefined                         | yes                                    |
| MR20                                | other                  | positive                  | undefined                   | alright                           | yes                                    |
| MR21                                | other                  | positive                  | positive                    | alright                           | yes                                    |
| MR22                                | non-economic           | negative                  | neutral                     | undefined                         | mixed                                  |
| MR23                                | economic               | positive                  | positive                    | alright                           | yes                                    |
| <b>Swimming<br/>Pools [N=12]</b>    |                        |                           |                             |                                   |                                        |
| SP1                                 | non-economic           | neutral                   | neutral                     | alright                           | yes                                    |
| SP2                                 | non-economic           | positive                  | positive                    | unfair                            | yes                                    |
| SP3                                 | undefined              | positive                  | undefined                   | alright                           | undefined                              |
| SP4                                 | non-economic           | positive                  | positive                    | unfair                            | undefined                              |
| SP5                                 | economic               | neutral                   | positive                    | unfair                            | yes                                    |
| SP6                                 | economic               | positive                  | positive                    | alright                           | yes                                    |
| SP7                                 | non-economic           | positive                  | positive                    | undefined                         | yes                                    |
| SP8                                 | economic               | undefined                 | neutral                     | unfair                            | yes                                    |
| SP9                                 | economic               | neutral                   | neutral                     | undefined                         | undefined                              |
| SP10                                | undefined              | neutral                   | neutral                     | alright                           | yes                                    |
| SP11                                | non-economic           | neutral                   | positive                    | alright                           | yes                                    |
| SP12                                | non-economic           | undefined                 | positive                    | undefined                         | yes                                    |
| <b>Ice Skating<br/>Rinks [N=6]</b>  |                        |                           |                             |                                   |                                        |
| ISK 1                               | non-economic           | positive                  | positive                    | unfair                            | yes                                    |
| ISK2                                | non-economic           | positive                  | positive                    | unfair                            | yes                                    |
| ISK3                                | non-economic           | positive                  | positive                    | undefined                         | yes                                    |
| ISK4                                | non-economic           | neutral                   | positive                    | alright                           | yes                                    |
| ISK5                                | non-economic           | positive                  | neutral                     | undefined                         | yes                                    |
| ISK6                                | non-economic           | positive                  | neutral                     | undefined                         | undefined                              |

|                              | Phase I            | Phase II              |                         | Phase III                     |                                    |
|------------------------------|--------------------|-----------------------|-------------------------|-------------------------------|------------------------------------|
| <b>Bonus Partners [N=13]</b> | <b>main motive</b> | <b>visitor effect</b> | <b>marketing effect</b> | <b>distribution of income</b> | <b>fulfillment of expectations</b> |
| BP1                          | economic           | positive              | positive                | alright                       | yes                                |
| BP2                          | economic           | neutral               | positive                | alright                       | yes                                |
| BP3                          | economic           | neutral               | neutral                 | alright                       | no                                 |
| BP4                          | economic           | positive              | positive                | alright                       | yes                                |
| BP5                          | other              | neutral               | neutral                 | alright                       | partly                             |
| BP6                          | economic           | neutral               | neutral                 | alright                       | no                                 |
| BP7                          | economic           | neutral               | neutral                 | alright                       | no                                 |
| BP8                          | economic           | positive              | positive                | undefined                     | yes                                |
| BP9                          | other              | neutral               | neutral                 | alright                       | yes                                |
| BP10                         | economic           | neutral               | positive                | alright                       | yes                                |
| BP11                         | economic           | neutral               | neutral                 | undefined                     | yes                                |
| BP12                         | economic           | positive              | positive                | alright                       | undefined                          |
| BP13                         | economic           | positive              | positive                | undefined                     | yes                                |

### **Museums**

**[N=6]**

|     |              |            |            |           |        |
|-----|--------------|------------|------------|-----------|--------|
| MU1 | economic     | no effects | no effects | unfair    | yes    |
| MU2 | economic     | positive   | positive   | undefined | partly |
| MU3 | economic     | positive   | positive   | alright   | no     |
| MU4 | economic     | positive   | positive   | unfair    | yes    |
| MU5 | economic     | positive   | positive   | alright   | yes    |
| MU6 | non-economic | neutral    | neutral    | unfair    | yes    |
